# Supplementary material for: Selective epichlorohydrin-sensing performance of Ag nanoparticles decorated porous SnO2architectures
Source: Royal Society of Chemistry journal article supplement (doi:10.1039/c3ce41478g), 2013-10-08
Supplement: c3ce41478g.pdf [file c3ce41478g.pdf]

Supporting Information

for

**Selectivity epichlorohydrin-sensing performance of Ag  
nanoparticles decorated porous SnO<sub>2</sub> architectures**

Zhenglin Zhang,<sup>a, b</sup> Haiyan Song,<sup>b</sup> Shishu Zhang,<sup>b</sup> Junyan Zhang,<sup>b</sup> Wenya Bao,<sup>b</sup>  
Quanqin Zhao,<sup>\* b</sup> Xiang Wu,<sup>\* a, b</sup>

<sup>a</sup> Key Laboratory for Photonic and Electronic Bandgap Materials, Ministry of Education and College of Chemistry and Chemical Engineering, Harbin Normal University, Harbin 150025, P. R. China. Tel: +86-0451-8806-0570; E-mail: wuxiang05@gmail.com

<sup>b</sup> Key Laboratory for Colloid & Interface Chemistry of Education Ministry, Department of Chemistry, Shandong University, Jinan, 250100, Shandong, P. R. China. E-mail: zhaqq@sdu.edu.cn

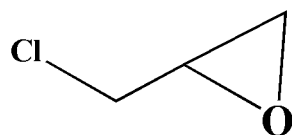

Fig. S1 The structural formulae of Epichlorohydrin.

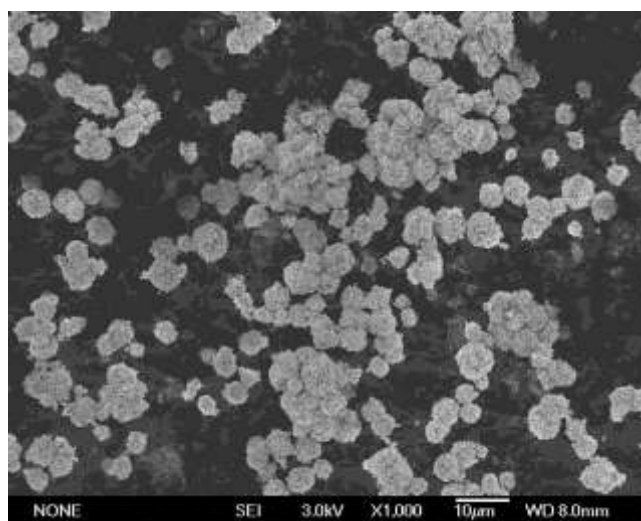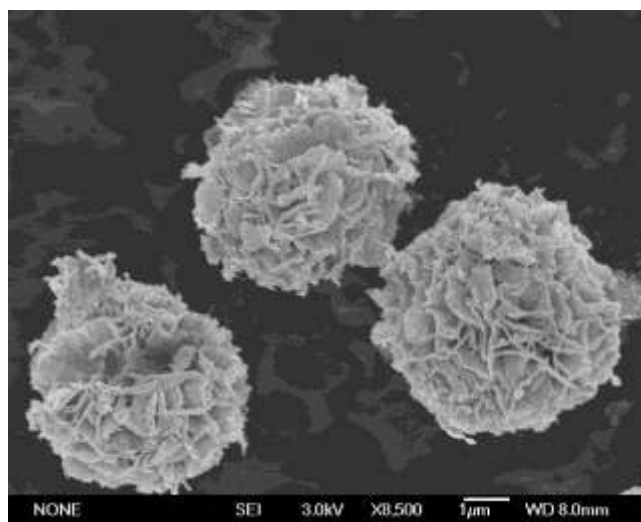

Fig. S2 Morphology of the as-synthesized porous SnO<sub>2</sub> MFs, SEM image at low magnification.

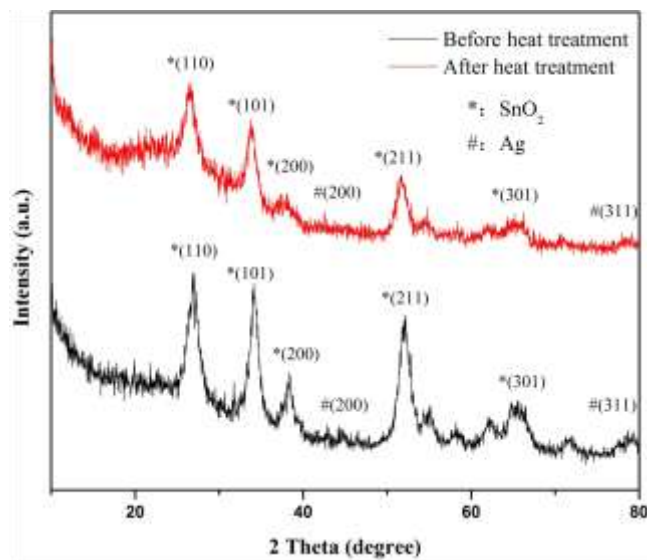

Fig. S3. XRD of 10% Ag NPs decorated porous SnO<sub>2</sub> MFs before and after the heat treatment at 180 °C in air for 24 h.
